# Supplementary material for: Benefits outweigh the risks: a consensus statement on the risks of physical activity for people living with long-term conditions
Source: HighWire-hosted journal article supplement (doi:10.1136/bjsports-2021-104281), 2021-10-14
Supplement: bjsports-2021-104281supp002_data_supplement.pdf [file bjsports-2021-104281supp002_data_supplement.pdf]

## Supplementary file 2. List of contributors by group

### Authorship group (n=5)

| Name             | Institution                                                                               | Role                                                                                           |
|------------------|-------------------------------------------------------------------------------------------|------------------------------------------------------------------------------------------------|
| Dr Natasha Jones | Faculty of Sport and Exercise Medicine, Oxford University Hospitals NHS Foundation Trust  | Consultant in Sport and Exercise Medicine, Clinical Director Moving Medicine                   |
| Dr Hamish Reid   | Faculty of Sport and Exercise Medicine, Centre for Sport and Orthopaedic Medicine Bermuda | Consultant in Sport and Exercise Medicine, Clinical Director, Moving Medicine                  |
| Dr Ashley Ridout | Oxford University Hospital NHS Foundation Trust                                           | Specialist Registrar, Sport and Exercise Medicine, Specialist trainee lead for Moving Medicine |
| Dr Simone Tomaz  | Post-doctoral Research Fellow                                                             | Physical Activity for Health Research Centre, University of Edinburgh                          |
| Dr Paul Kelly    | Reader in Physical Activity for Health                                                    | Physical Activity for Health Research Centre, University of Edinburgh                          |

### Stakeholder group (n=4)

| Name                               | Institution                                                         | Role                                                                          |
|------------------------------------|---------------------------------------------------------------------|-------------------------------------------------------------------------------|
| Suzanne Gardener                   | Sport England                                                       | National Partnership lead, Health and Inactivity                              |
| Sarah Ruane                        | Sport England                                                       | Strategic Health Lead                                                         |
| Dr Mike Brannan/Mr Jamie Blackshaw | Public Health England                                               | National Leads for Diet, Obesity and Physical Activity                        |
| Dr Andrew Boyd                     | Royal College of General Practitioners, Clapham Park Group practice | GP Partner and RCGP Clinical Priority Champion, physical activity & lifestyle |

## PHYSICAL ACTIVITY RISK CONSENSUS GROUP MEMBERS

### Steering Group (n=13)

| Name                  | Role                                                                                                                                                                                            | Institution                                                            |
|-----------------------|-------------------------------------------------------------------------------------------------------------------------------------------------------------------------------------------------|------------------------------------------------------------------------|
| Chair: Charlie Foster | UK Chief Medical Officers Expert Committee for Physical Activity<br>Past President - International Society for Physical Activity and Health<br>Professor of Physical Activity and Public Health | University of Bristol                                                  |
| Catherine Lester      | Consultant in Sport and Exercise Medicine                                                                                                                                                       | Moving Medicine Lead, Queen Mary University London                     |
| Chris Pugh            | Professor of Renal Medicine, Honorary Consultant Physician                                                                                                                                      | Oxford University and Oxford University Hospitals NHS Foundation Trust |
| Christopher Speers    | Consultant in Sport and Exercise Medicine                                                                                                                                                       | Oxford University Hospitals NHS Foundation Trust                       |
| Esther Clift          | Consultant Practitioner in Frailty                                                                                                                                                              | Southern Health NHS Foundation Trust                                   |
| Gill Cowburn          | Qualitative Researcher                                                                                                                                                                          | Independent                                                            |
| James Hull            | Consultant Respiratory Physician                                                                                                                                                                | Royal Brompton & Harefield Hospitals Specialist Care                   |
| Kim Gregory           | Consultant in Sport and Exercise Medicine                                                                                                                                                       | University Hospitals Birmingham                                        |
| Michelle Roberts      | Physical Activity and Health Programme Manager                                                                                                                                                  | Richmond Group of Charities                                            |
| Nikant Sabharwal      | Consultant Cardiologist and Head of the Nuclear Cardiology Department                                                                                                                           | Oxford University Hospitals NHS Foundation Trust                       |
| Sheera Sutherland     | Renal Dialysis Research Nurse                                                                                                                                                                   | Oxford University Hospitals NHS Foundation Trust                       |
| Tracy Barnett         | Lead Physiotherapist, Physical Activity Pilot                                                                                                                                                   | Oxford University Hospitals NHS Foundation Trust                       |
| William Bird          | GP and CEO of Intelligent Health Ltd                                                                                                                                                            | Intelligent Health Ltd                                                 |

**Delphi Group (n=29)**

| <b>Name</b>        | <b>Title</b>                                                    | <b>Institution</b>                               | <b>Bio</b>                                                                                                                                                                                                                                                                                                                                                     |
|--------------------|-----------------------------------------------------------------|--------------------------------------------------|----------------------------------------------------------------------------------------------------------------------------------------------------------------------------------------------------------------------------------------------------------------------------------------------------------------------------------------------------------------|
| Perdy van den Berg | Diabetes Specialist Nurse in Primary Care.                      | Oxford Health NHS Foundation Trust               | Diabetes Specialist Nurse in Primary Care. Formerly Clinical Lead, Oxfordshire Community Diabetes Service and Diabetes Quality Improvement Lead for Thames Valley Clinical Network (NHSE). Member of the NICE Guideline Development Group 2013-15 NG17 Type 1 Diabetes in adults: diagnosis and management and 2016 Quality Standard - diabetes in adults QS6. |
| Jordan Bowen       | Consultant Physician in Acute and Geriatric Medicine            | Oxford University Hospitals NHS Foundation Trust | Consultant Physician in Acute and Geriatric Medicine. Special interest in Acute Ambulatory Care and Complex Interface Care                                                                                                                                                                                                                                     |
| Muir Gray          | Consultant in Public Health                                     | The Optimal Ageing Programme                     | Consultant in Public Health providing knowledge to support our aging population to live better via <a href="http://www.livelongerbetter.net">www.livelongerbetter.net</a> . Additional special interest in teenagers with long term conditions.                                                                                                                |
| Rob Andrews        | Associate Professor of Diabetes/Honorary Consultant in Diabetes | University of Exeter                             | Expert in exercise and both Type 1 and Type 2 Diabetes.                                                                                                                                                                                                                                                                                                        |
| Kim Gregory        | Consultant in Sport and Exercise Medicine                       | University Hospitals of Birmingham               | Consultant Physician in Sport and Exercise Medicine                                                                                                                                                                                                                                                                                                            |
| Chris Swindale     | Respiratory Physiotherapist                                     | Oxford Health NHS Foundation Trust.              | Physiotherapist with 15 years' experience. 12 years' experience in Respiratory Care, the last 6 of which have been community based, with specific emphasis on COPD and other chronic lung conditions.                                                                                                                                                          |
| Paula Manning      | Physiotherapist                                                 | Derbyshire Healthcare NHS Trust                  | Physiotherapist, working in mental health inpatients hospital and as a Physical Activity Clinical Champion for PHE, delivering free training to HCPs to encourage themselves and their patients to be more physically active.                                                                                                                                  |

|                  |                                                                                      |                                                                        |                                                                                                                                                                                                                                                                                                                                                                                                                                                                                                                                                                                                                                                                                                                                                                           |
|------------------|--------------------------------------------------------------------------------------|------------------------------------------------------------------------|---------------------------------------------------------------------------------------------------------------------------------------------------------------------------------------------------------------------------------------------------------------------------------------------------------------------------------------------------------------------------------------------------------------------------------------------------------------------------------------------------------------------------------------------------------------------------------------------------------------------------------------------------------------------------------------------------------------------------------------------------------------------------|
| Nikant Sabharwal | Consultant Cardiologist and Head of the Nuclear Cardiology Department                | Oxford University Hospitals NHS Foundation Trust                       | Consultant Cardiologist with interest in Exercise Medicine                                                                                                                                                                                                                                                                                                                                                                                                                                                                                                                                                                                                                                                                                                                |
| Brian Johnson    | GP, Honorary Medical Advisor to Public Health Wales                                  | NHS                                                                    | GP and Sport and Exercise Medicine practitioner, Honorary Medical Advisor to PHWales, RCGP Clinical Priority of Physical Activity and Lifestyle Steering group member, CEO of Motivate2Move.co.uk and Benefitfromactivity.org                                                                                                                                                                                                                                                                                                                                                                                                                                                                                                                                             |
| Anushka Soni     | Rheumatologist                                                                       | Nuffield Department of Orthopaedics                                    | Rheumatologist with a research interest in Musculoskeletal Pain Mechanisms. During my DPhil, I studied the impact of abnormal central pain processing in patients with osteoarthritis of the knee. I showed a relationship between the presence of neuropathic pain and central sensitization pre-operatively, and that this modified the patient's response to knee replacement surgery. Moving forwards, my work will use a combination of techniques, including neuroimaging and clinical pain quantification, to investigate pain related predictors of response to treatment in inflammatory arthritis as well as fibromyalgia.                                                                                                                                      |
| Scarlett McNally | Consultant Orthopaedic Surgeon, Deputy Director of the Centre for Perioperative Care | Eastbourne District General Hospital                                   | Consultant Orthopaedic Surgeon, Eastbourne D.G.H. since 2002. Elected council member of the Royal College of Surgeons of England, 2011-21. Lead author of 'Exercise the miracle cure and the role of the doctor in promoting it'. Other published work on the link with the economy and social care – we need environments and expectations to change to support everybody to be more active which would reduce need for social care (and improve mental and physical health). Deputy Director of the Centre for Perioperative Care ( <a href="http://www.cpoc.org.uk">www.cpoc.org.uk</a> aimed at getting people fitterbettersooner around an operation). Papers on <a href="http://www.scarlettmcnally.co.uk">www.scarlettmcnally.co.uk</a> . Twitter @scarlettmcnally |
| Cliff Kilgore    | Consultant Nurse for Intermediate Care and Older People                              | Dorset Healthcare NHS Trust                                            | Consultant Geriatrician Nurse specialising in care of older people and visiting Fellow to Bournemouth University                                                                                                                                                                                                                                                                                                                                                                                                                                                                                                                                                                                                                                                          |
| Chris Pugh       | Professor of Renal Medicine, Honorary Consultant Physician                           | Oxford University and Oxford University Hospitals NHS Foundation Trust | Professor of Renal Medicine, University of Oxford.                                                                                                                                                                                                                                                                                                                                                                                                                                                                                                                                                                                                                                                                                                                        |

|                   |                                                                                                       |                                                                                                    |                                                                                                                                                                                                                                                                                                                                                     |
|-------------------|-------------------------------------------------------------------------------------------------------|----------------------------------------------------------------------------------------------------|-----------------------------------------------------------------------------------------------------------------------------------------------------------------------------------------------------------------------------------------------------------------------------------------------------------------------------------------------------|
| Sarah Wheatley    | Exercise teacher                                                                                      | Age UK Oxfordshire                                                                                 | Exercise teacher. Responsible for shaping community exercise services for older adults, previously for NHS and currently for Age UK Oxfordshire.                                                                                                                                                                                                    |
| Lucy Gossage      | Consultant Medical Oncologist.                                                                        | Nottingham University Hospitals NHS                                                                | Medical Oncology Consultant in Nottingham with an interest in Exercise Oncology. Co-founder of 5K Your Way, Move Against Cancer ( <a href="http://www.5kyourway.org">www.5kyourway.org</a> ) and have spoken about physical activity in those living with and after cancer at national and international conferences.                               |
| Anna Lowe         | Programme Manager, Physiotherapist                                                                    | National Centre for Sport & Exercise Medicine, Sheffield.                                          | Programme Manager at the National Centre for Sport & Exercise Medicine, Sheffield.                                                                                                                                                                                                                                                                  |
| Rebecca Robinson  | Consultant in Sport and Exercise Medicine                                                             | Sheffield Teaching Hospitals NHS Foundation Trust                                                  | Consultant in Sport and Exercise Medicine.                                                                                                                                                                                                                                                                                                          |
| Rebecca Appelboam | Consultant in Intensive Care Medicine                                                                 | Royal Devon and Exeter NHS Foundation Trust                                                        | Consultant in Intensive Care Medicine, involved in the follow up of survivors of intensive care in multidisciplinary clinics which patients are invited to 3 months after discharge from hospital. We tackle the psychological cognitive, and physical deficits that survivors experience, and provide support and advice to aid rehabilitation     |
| Diana Greenfield  | Consultant Nurse in Late Effects (of cancer treatments) and Honorary Professor in Cancer Survivorship | Consultant Nurse at Sheffield Teaching Hospital, Honorary Professor of The University of Sheffield | Consultant Nurse in Late Effects (of cancer treatments) and Honorary Prof in Cancer Survivorship. Diana Greenfield is a National Institute for Health Research (NIHR) Senior Nurse Research Leader. The views expressed in this article are those of the author and not necessarily those of the NIHR, or the Department of Health and Social Care. |
| Alistair Lumb     | Consultant in Diabetes and General Medicine                                                           | Oxford University Hospitals NHS Foundation Trust                                                   | Consultant in Diabetes and General Medicine at Oxford University Hospitals NHS Foundation Trust. Affiliated to NIHR Oxford BRC Specialist interest in managing Diabetes (particularly type 1 diabetes) for physical activity and exercise                                                                                                           |
| Sheera Sutherland | Renal Dialysis Research Nurse                                                                         | Oxford University Hospitals NHS Foundation Trust                                                   | Renal Dialysis Research Nurse in Renal Rehabilitation                                                                                                                                                                                                                                                                                               |

|                 |                                                                                                              |                                                      |                                                                                                                                                                                                                                                                                                                                                                                                            |
|-----------------|--------------------------------------------------------------------------------------------------------------|------------------------------------------------------|------------------------------------------------------------------------------------------------------------------------------------------------------------------------------------------------------------------------------------------------------------------------------------------------------------------------------------------------------------------------------------------------------------|
| Julia Newton    | Clinical Academic and Consultant in Rheumatology/Sport and Exercise Medicine                                 | Oxford University Hospitals NHS Foundation Trust     | Clinical Academic and Consultant in Rheumatology/Sport and Exercise Medicine                                                                                                                                                                                                                                                                                                                               |
| Sally Retallick | Lead nurse in Weald PCN                                                                                      | West Kent Health NHS                                 | Practice Nurse in West Kent caring for a range of patients including those with long term conditions. Lead nurse in Weald PCN and Physical Activity Clinical Champion for PHE, delivering free training to HCPs to encourage themselves and their patients to be more physically active.                                                                                                                   |
| Andrew Murray   | GP and Consultant in Sport and Exercise Medicine                                                             | The University of Edinburgh                          | GP and Consultant in SEM. Previous employment working full time in Public Health policy (Scottish Government). Current Vice-President Ramblers Scotland.                                                                                                                                                                                                                                                   |
| James Hull      | Consultant respiratory physician                                                                             | Royal Brompton & Harefield Hospitals Specialist Care | Consultant Respiratory physician with expertise in asthma, chronic lung disease and impact of exercise in this context                                                                                                                                                                                                                                                                                     |
| Marie Murphy    | Professor of Exercise and Health, Dean of Postgraduate Research and Director of the Ulster Doctoral College. | Ulster University                                    | Professor of Exercise and Health, Dean of Postgraduate Research and Director of the Ulster Doctoral College. Marie's research focuses on the effect of physical activity and exercise, in particular walking, on health and uses multidisciplinary approach that has included outcome measures ranging from the behavioural to the biochemical.                                                            |
| Tracy Barnett   | Lead Physiotherapist, Physical Activity Pilot                                                                | Oxford University Hospitals NHS Foundation Trust     | Senior Physiotherapist with a particular interest in neuro-rehabilitation. Physical Activity Champion for the Active Hospital Project at Oxford University Hospitals Foundation Trust. The project was commissioned by Public Health England to explore ways in which physical activity could be embedded into pathways in secondary care. Extensive work within Frailty pathways as part of this project. |
| Neil Heron      | Consultant in Sport and Exercise Medicine; GP; Clinical Lecturer                                             | Queen's University Belfast                           | Consultant in Sport and Exercise Medicine; GP; Clinical Lecturer with expertise in physical activity promotion.                                                                                                                                                                                                                                                                                            |

Amit Mistry

Consultant in General Adult  
& Old Age Psychiatry;  
Honorary Lecturer

Oxford Health NHS  
Foundation Trust,  
Queen Mary  
University of London

General Adult and Old Age Psychiatry and Sports Psychiatry. Chair of the Royal College of  
Psychiatrists (RCPsych) Sport & Exercise Psychiatry Special Interest Group.
